# Supplementary material for: Self-Reported Symptom Study of COVID-19 Chemosensory Dysfunction in Malaysia
Source: Research Square preprint supplement (doi:10.21203/rs.3.rs-696505/v1), 2021-07-12
Supplement: Supplementary file 1 [file ffb32da478ae845a05ba1f93.docx]

**Supplementary Materials**

Methods 1: Study Questionnaire (English Version)

Methods 2: Study Questionnaire (Malay Version)

Methods 1: Study Questionnaire (English Version)

**1. Age:**

__________________

**2. Gender:**

- Male
- Female

**3. Nationality:**

- Malaysian
- Non-Malaysian

**4. Ethnicity:**

- Malay
- Chinese
- Indian
- Iban
- Bidayuh
- Melanau
- Kadazan
- Dusun
- Murut
- Others:_________

**5. Occupation:**

____________________

**6. Which district/town/city do you live in?**

**____________________**

**7. Which state do you live in?**

**_____________________**

**8. Have you been diagnosed with COVID-19?**

- Yes
- No

**9. When were you diagnosed with COVID-19 (Date of 1st RT-PCR test positive result)?**

Date: ___________________ (estimate date if unable to recall)

**10. Is the source of your COVID-19 infection identifiable?**

- Yes
- No

**11. Were you diagnosed with any OTHER respiratory illness (not COVID-19) in the last 2 weeks before your diagnosis with COVID-19?**

- Bacterial throat infection
- Flu (Influenza)
- Another viral illness
- Others: ________
- None

**12. Please state your risk factors for COVID-19 infection (*select as many as applicable*):**

- None
- Healthcare worker (Doctor, Dentist, Nurse, Pharmacist, Allied Health Professionals)
- Non-clinical Hospital Staff (including cleaners)
- First Responder (Police, Firefighter, Military, Pre-Hospital Care Staff)
- Close contact with a confirmed case
- Travel/resided in foreign countries/areas with widespread community transmission within 14 days before onset of symptoms
- Mass gatherings (e.g. Jemaah Tabligh at Sri Petaling Mosque)
- Living in crowded conditions (Dormitories, Nursing Home, Prison, Shelters)
- Homelessness
- Others, please state: ___________

**13. Please choose any of the following health conditions that you have/conditions that apply to you (*select as many as applicable*):**

- None
- Smoking
- History of head trauma (e.g. from road traffic accidents)
- Previous surgery to the head/brain
- Previous sinus/nose surgery
- Rhinosinusitis
- Allergies/Allergic rhinitis
- Chronic respiratory disease/asthma
- Cardiac disease
- Hypertension
- Diabetes Mellitus
- Neurologic disease (e.g. Parkinson’s, Alzheimer’s)
- Psychiatric disorders (e.g. Depression, Schizophrenia)
- Obesity
- Obstructive Sleep Apnoea (OSA)
- Others, please state: ________

**14. What symptoms did you have when you were diagnosed with COVID-19? (*Please select as many as applicable*)**

- None
- Fever
- Chills
- Malaise
- Loss of smell
- Changes in food flavour/taste disturbance
- Cough
- Sore throat
- Shortness of breath
- Headache
- Nasal congestion/blockage
- Rhinorrhoea (Runny nose)
- Loss of appetite
- Muscle aches
- Gastrointestinal disorder (e.g. abdominal pain/diarrhoea/nausea)
- Ear symptoms (e.g. ear discharge/ear pain/tinnitus/reduced hearing)
- Eye symptoms (e.g. red eyes/watery eyes/eye swelling)
- Other: _________

**15. Did you experience any loss of smell when you were diagnosed with COVID-19?**

- Yes
- No

**16. If you had any loss of smell, was this your first symptom?**

- YES, loss of smell was my first symptom
- NO, loss of smell was not my first symptom
- Loss of smell was my only symptoms
- I do not have any loss of smell

**17. If loss of smell was NOT your first symptom, when did this symptom begin?**

- At the same time as the other COVID-19 symptoms (as those in Question 14
- After the other COVID-19 symptoms (as those in Question 14)
- Loss of smell is my only symptom
- I do not have any loss of smell

**18. Did you experience any taste disturbance?**

- Yes
- No

**19. If you had any taste disturbance, was this your first symptom?**

- YES, taste disturbance was my first symptom
- NO, taste disturbance was not my first symptom
- Taste disturbance was my ONLY symptom
- I do not have taste disturbance

**20. If taste disturbance was not your first symptom, when did this symptom begin?**

- At the same time as the other COVID-19 symptoms (as those in Question 14
- After the other COVID-19 symptoms (as those in Question 14)
- Taste disturbance was my only symptom
- I do not have taste disturbance

**21. Did your COVID-19 infection worsen or improve after you started to notice your smell/taste disturbance?**

- Worsen
- Improve

**22. Now, have you recovered from your smell/taste disturbance?**

- Yes
- No

**23. Did you receive any specific treatment for your taste/smell disorder?**

- Yes
- No

**24. Please rate these problems as they have been over the past 2 weeks BEFORE your diagnosis with COVID-19 (Circle where appropriate, choose 0 if you did not experience this problem/symptom)**

| **No.** | **Problem** | **No Problem** | **Very Mild Problem** | **Mild or Slight Problem** | **Moderate Problem** | **Severe Problem** | **Problem as bad as it can be** |
| --- | --- | --- | --- | --- | --- | --- | --- |
| 1 | Decreased sense of smell | 0 | 1 | 2 | 3 | 4 | 5 |
| 2 | Decreased sense of taste | 0 | 1 | 2 | 3 | 4 | 5 |
| 3 | Ear Pain | 0 | 1 | 2 | 3 | 4 | 5 |
| 4 | Ear Fullness | 0 | 1 | 2 | 3 | 4 | 5 |

**Please tick as appropriate**

**25. Rate your ability to smell BEFORE your COVID-19 diagnosis?**

| No sense of smell |  |  |  |  |  |  |  |  |  | Excellent sense of smell |
| --- | --- | --- | --- | --- | --- | --- | --- | --- | --- | --- |
| 🄋 | ➀ | ➁ | ➂ | ➃ | ➄ | ➅ | ➆ | ➇ | ➈ | ➉ |

**26. Rate your ability to smell DURING your COVID-19 diagnosis?**

| No sense of smell |  |  |  |  |  |  |  |  |  | Excellent sense of smell |
| --- | --- | --- | --- | --- | --- | --- | --- | --- | --- | --- |
| 🄋 | ➀ | ➁ | ➂ | ➃ | ➄ | ➅ | ➆ | ➇ | ➈ | ➉ |

**27. Have you experienced any of the following changes in smell with your COVID-19 diagnosis?** (select as many as applicable)

- I cannot smell at all
- Smells smell less strong than they did before
- Smells smell different than they did before (the quality of smell has changed)
- Smells smell unpleasant
- I can smell things that aren’t there (e.g. I smell burning when nothing is on fire)
- Sense of smell fluctuates (comes and goes)
- No change in sense of smell

**28. Please describe any additional changes in smell:**

_________________________

**29. Rate your ability to smell NOW**

| No sense of smell |  |  |  |  |  |  |  |  |  | Excellent sense of smell |
| --- | --- | --- | --- | --- | --- | --- | --- | --- | --- | --- |
| 🄋 | ➀ | ➁ | ➂ | ➃ | ➄ | ➅ | ➆ | ➇ | ➈ | ➉ |

**30. How blocked was your nose BEFORE your diagnosis of COVID-19?**

| Not at all blocked |  |  |  |  |  |  |  |  |  | Completely blocked |
| --- | --- | --- | --- | --- | --- | --- | --- | --- | --- | --- |
| 🄋 | ➀ | ➁ | ➂ | ➃ | ➄ | ➅ | ➆ | ➇ | ➈ | ➉ |

**31. How blocked was your nose DURING your diagnosis of COVID-19?**

| Not at all blocked |  |  |  |  |  |  |  |  |  | Completely blocked |
| --- | --- | --- | --- | --- | --- | --- | --- | --- | --- | --- |
| 🄋 | ➀ | ➁ | ➂ | ➃ | ➄ | ➅ | ➆ | ➇ | ➈ | ➉ |

**32. How blocked is your nose NOW?**

| Not at all blocked |  |  |  |  |  |  |  |  |  | Completely blocked |
| --- | --- | --- | --- | --- | --- | --- | --- | --- | --- | --- |
| 🄋 | ➀ | ➁ | ➂ | ➃ | ➄ | ➅ | ➆ | ➇ | ➈ | ➉ |

**33. Rate your ability to taste BEFORE your diagnosis of COVID-19?**

| No sense of taste |  |  |  |  |  |  |  |  |  | Excellent  sense of taste |
| --- | --- | --- | --- | --- | --- | --- | --- | --- | --- | --- |
| 🄋 | ➀ | ➁ | ➂ | ➃ | ➄ | ➅ | ➆ | ➇ | ➈ | ➉ |

**34. Rate your ability to taste DURING your diagnosis of COVID-19?**

| No sense of taste |  |  |  |  |  |  |  |  |  | Excellent sense of taste |
| --- | --- | --- | --- | --- | --- | --- | --- | --- | --- | --- |
| 🄋 | ➀ | ➁ | ➂ | ➃ | ➄ | ➅ | ➆ | ➇ | ➈ | ➉ |

**35. Have you experienced any changes to specific tastes with your recent COVID-19 diagnosis?** (select as many as applicable)

- Sweet
- Salty
- Sour
- Bitter
- Savoury/Umami
- No change to sense of taste

**36. Rate your ability to taste NOW**

| No sense of taste |  |  |  |  |  |  |  |  |  | Excellent sense of taste |
| --- | --- | --- | --- | --- | --- | --- | --- | --- | --- | --- |
| 🄋 | ➀ | ➁ | ➂ | ➃ | ➄ | ➅ | ➆ | ➇ | ➈ | ➉ |

**The following THREE questions related to other sensations in your mouth like burning, cooling or tingling. For example, chilli, mint, or carbonated drinks**

**37. Rate your ability to feel these other sensations BEFORE your COVID19 diagnosis?**

| Not sensitive at all |  |  |  |  |  |  |  |  |  | Very  Sensitive |
| --- | --- | --- | --- | --- | --- | --- | --- | --- | --- | --- |
| 🄋 | ➀ | ➁ | ➂ | ➃ | ➄ | ➅ | ➆ | ➇ | ➈ | ➉ |

**38. Rate your ability to feel these other sensations BEFORE your COVID19 diagnosis?**

| Not sensitive at all |  |  |  |  |  |  |  |  |  | Very  Sensitive |
| --- | --- | --- | --- | --- | --- | --- | --- | --- | --- | --- |
| 🄋 | ➀ | ➁ | ➂ | ➃ | ➄ | ➅ | ➆ | ➇ | ➈ | ➉ |

**39. Rate your ability to feel these other sensations NOW**

| Not sensitive at all |  |  |  |  |  |  |  |  |  | Very  Sensitive |
| --- | --- | --- | --- | --- | --- | --- | --- | --- | --- | --- |
| 🄋 | ➀ | ➁ | ➂ | ➃ | ➄ | ➅ | ➆ | ➇ | ➈ | ➉ |

**40. What ear symptom(s) did you experience when you were diagnosed with COVID-19?** (*Please select as many as applicable)*

- None
- Ear pain/tenderness
- Ear discharge
- Reduced hearing/loss of hearing
- Ringing sound in the ears (tinnitus)
- Spinning sensation (vertigo)
- Others, please state: __________________

**41. Did your ear symptom(s) resolve?**

- Yes
- No
- I did not have ear symptom

**42. Did you receive specific any treatment for your ear symptom(s):**

- Yes
- No
- I did not have ear symptom

**43. What is your current COVID-19 infection status?**

- Active – still admitted in hospital
- Discharged home

**44. Comments/Additional Information:**

_________________________________________________________________________

_________________________________________________________________________

**If you agree to be contacted, please provide us your contact details:** (optional)

Telephone number (Mobile): ______________________________________________________

Telephone number (Home): _______________________________________________________

E-mail: _______________________________________

**How would you prefer to be contacted?** (*Please select as many as applicable*)

- Telephone
- WhatsApp
- Email

**This form is filled up by:**

- Myself (participant)
- Proxy – family member/caretaker
- Proxy – treating team

**Mobile phone number of proxy** (optional/if applicable): _______________________

**Thank you very much for your participation in this survey!**

**Methods 2: Malaysian COVID-19 Anosmia Study Questionnaire (Malay Version)**

**1. Umur:**

_________________

**2. Jantina:**

- Lelaki
- Perempuan

**3. Warganegara:**

- Malaysia
- Bukan Malaysia

**4. Kaum:**

- Melayu
- Cina
- India
- Iban
- Bidayuh
- Melanau
- Kadazan
- Dusun
- Murut
- Lain-lain, sila nyatakan: ___________

**5. Pekerjaan:**

_____________

**6. Daerah/Bandar/Bandaraya yang anda diami sekarang:**

__________________

**7. Negeri yang anda diami sekarang:**

___________________

**8. Adakah anda telah disahkan menghidapi penyakit COVID-19?**

- Ya
- Tidak

**9. Bilakah anda didiagnosa dengan penyakit COVID-19? (Tarikh keputusan RT-PCR pertama yang positif)**

Tarikh: _____________________ (sila anggarkan tarikh sekiranya tidak dapat ingat dengan tempat, dalam format “hari/bulan/tahun”)

**10. Adakah punca jangkitan COVID-19 anda dikenalpasti?**

- Ya
- Tidak

**11. Adakah anda didiagnosakan dengan apa-apa penyakit/masalah pernafasan YANG LAIN (bukan COVID-19) dalam tempoh 2 minggu sebelum diagnosis COVID-19 anda?**

- Sakit/jangkitan tekak
- Selsema (Influenza)
- Jangkitan virus yang lain
- Lain-lain: _________
- Tiada

**12. Sila nyatakan faktor risiko anda untuk jangkitan COVID-19?** (*anda boleh pilih lebih daripada satu*)

- Tiada
- Petugas kesihatan (Doktor, Doktor Gigi, Jururawat, Farmasi, Anggota Kesihatan Bersekutu)
- Staf hospital bukan klinikal (termasuk penjaga kebersihan)
- *Responder* pertama (Polis, Bomba, Anggota Pertahanan, Staf Penjagaan Pra-Hospital)
- Hubungan rapat dengan pesakit positif COVID-19
- Melancong/menetap di kawasan/negara asing dengan penularan wabak COVID-19 dalam lingkungan 14 hari sebelum bermulanya simptom
- Himpunan beramai-ramai (contohnya himpunan Jemaah Tabligh di Masjid Sri Petaling)
- Tinggal di kawasan sesak/berhimpit (seperti asrama, pusat penjagaan warga emas, penjara, tempat perlindungan kanak-kanak/wanita)
- Tiada tempat tinggal
- Lain-lain: ___________

**13. Sila senaraikan penyakit lain yang anda hidapi/keadaan yang berkaitan dengan anda:** (*anda boleh pilih lebih daripada satu*)

- Tiada
- Merokok
- Pernah mengalami kecederaan kepala (contohnya dalam kemalangan jalan-raya)
- Pernah menjalani pembedahan kepala/otak
- Pernah menjalani pembedahan sinus/hidung
- Resdung (*rhinosinusitis*)
- Radang/alahan hidung (*allergic rhinitis*)
- Penyakit paru-paru kronik/lelah
- Penyakit jantung
- Darah tinggi
- Kencing manis
- Penyakit otak/saraf (seperti Parkinson’s, Alzheimer’s)
- Penyakit mental [contoh: kemurungan (*depression*),skizofrenia]
- Obesiti
- Masalah mendengkur
- Others: ________

**14. Apakah simptom/gejala yang anda alami ketika disahkan menghidapi penyakit COVID-19?** (*anda boleh pilih lebih daripada satu*)

- Tiada
- Demam
- Mengigil
- Letih lesu
- Hilang deria bau
- Perubahan rasa makanan/hilang deria rasa
- Batuk
- Sakit tekak
- Sesak nafas
- Sakit kepala
- Sumbat hidung
- Hidung berair
- Kurang selera makan
- Sakit otot
- Sakit perut/cirit-birit/loya/muntah
- Simptom telinga (telinga berair/bernanah/sakit telinga/berdengung/kurang dengar)
- Simptom mata (mata merah/berair/bengkak)
- Lain-lain: _________

**15. Adakah anda mengalami kehilangan/kurang deria bau?**

- Ya
- Tidak

**16. Jika anda ada kehilangan/kurang deria bau, adakah ini simptom PERTAMA anda?**

- YA,hilang/kurang deria bau merupakan simptom pertama saya
- Tidak, hilang/kurang deria bau bukan simptom pertama saya
- Hilang/kurang deria bau merupakan SATU-SATUNYA simptom saya
- Saya tidak mengalami kehilangan/kurang deria bau

**17. Jika kehilangan/kurang deria bau bukan simptom pertama anda, bilakah ianya bermula?**

- Sama waktu dengan simptom-simptom COVID-19 yang lain (sepertimana disenaraikan dalam soalan 14)
- Selepas simptom-simptom COVID-19 yang lain (sepertimana disenaraikan dalam soalan 14)
- Hilang/kurang deria bau merupakan SATU-SATUNYA simptom saya
- Saya tidak mengalami kehilangan/kurang deria bau

**18. Adakah anda mengalami gangguan/hilang deria rasa?**

- Ya
- Tidak

**19. Jika anda ada mengalami gangguan/hilang deria rasa, adakah ini simptom pertama anda?**

- YA, gangguan/hilang deria rasa merupakan simptom pertama saya
- TIDAK, gangguan/hilang deria rasa bukan simptom pertama saya
- Gangguan/hilang deria rasa merupakan SATU-SATUNYA simptom saya
- Saya tidak mengalami gangguan/hilang deria rasa

**20. Jika gangguan/hilang deria rasa bukan simptom pertama anda, bilakah ianya bermula?**

- Sama waktu dengan simptom-simptom COVID-19 yang lain (sepertimana disenaraikan dalam soalan 14)
- Selepas simptom-simptom COVID-19 yang lain (sepertimana disenaraikan dalam soalan 14)
- Hilang/kurang deria bau merupakan SATU-SATUNYA simptom saya
- Saya tidak mengalami kehilangan/kurang deria bau

**21. Adakah penyakit COVID-19 anda bertambah teruk atau baik selepas anda mula mengalami simptom ini?**

- Bertambah teruk
- Bertambah baik

**22. Sekarang, sudahkah anda pulih daripada gangguan deria bau/rasa?**

- Ya
- Tidak

**23. Adakah anda menerima rawatan khusus untuk gangguan deria bau atau rasa?**

- Ya
- Tidak

**24. Sila nilaikan masalah-masalah ini dalam tempoh 2 minggu SEBELUM disahkan menghidap penyakit COVID-19 (Pilih 0 jika anda tidak mengalami masalah ini)**

| **No.** | **Masalah** | **Tiada Masalah** | **Masalah sangat ringa** | **Masalah ringan** | **Masalah sederhana** | **Masalah teruk** | **Masalah paling teruk** |
| --- | --- | --- | --- | --- | --- | --- | --- |
| 1 | Kurang deria bau | 0 | 1 | 2 | 3 | 4 | 5 |
| 2 | Kurang deria rasa | 0 | 1 | 2 | 3 | 4 | 5 |
| 3 | Sakit telinga | 0 | 1 | 2 | 3 | 4 | 5 |
| 4 | Kepenuhan di telinga | 0 | 1 | 2 | 3 | 4 | 5 |

**25. Sila nilaikan tahap deria bau anda SEBELUM menghidap penyakit COVID-19?**

| Tiada deria bau |  |  |  |  |  |  |  |  |  | Deria bau sangat baik |
| --- | --- | --- | --- | --- | --- | --- | --- | --- | --- | --- |
| 🄋 | ➀ | ➁ | ➂ | ➃ | ➄ | ➅ | ➆ | ➇ | ➈ | ➉ |

**26. Sila nilaikan tahap deria bau anda KETIKA disahkan menghidap penyakit COVID-19?**

| Tiada deria bau |  |  |  |  |  |  |  |  |  | Deria bau sangat baik |
| --- | --- | --- | --- | --- | --- | --- | --- | --- | --- | --- |
| 🄋 | ➀ | ➁ | ➂ | ➃ | ➄ | ➅ | ➆ | ➇ | ➈ | ➉ |

**27. Adakan anda mengalami mana-mana perubahan deria bau anda apabila disahkan mengidap COVID-19?** (anda boleh pilih lebih daripada satu)

- Saya tidak dapat bau apa-apa langsung
- Deria bau kurang kuat daripada dulu
- Bauan kini berbeza daripada bauan yang terdahulu (kualiti bau telah berubah)
- Bauan kini kurang menyenangkan
- Membau bauan yang tidak wujud (contohnya, membau benda terbakar apabila tiada benda yang terbakar)
- Deria bau turn naik (adakalanya ada, adakalanya tiada)
- Tiada perubahan deria bau

**28. Sila nyatakan jika terdapat sebarang perubahan deria bau lain yang tidak dinyatakan di atas:**

_________________________

**29. Sila nilaikan tahap deria bau anda SEKARANG**

| Tiada deria bau |  |  |  |  |  |  |  |  |  | Deria bau sangat baik |
| --- | --- | --- | --- | --- | --- | --- | --- | --- | --- | --- |
| 🄋 | ➀ | ➁ | ➂ | ➃ | ➄ | ➅ | ➆ | ➇ | ➈ | ➉ |

**30. Seteruk manakah hidung anda tersumbat SEBELUM anda menghidap penyakit COVID-19?**

| Langsung tidak tersumbat |  |  |  |  |  |  |  |  |  | Tersumbat sepenuhnya |
| --- | --- | --- | --- | --- | --- | --- | --- | --- | --- | --- |
| 🄋 | ➀ | ➁ | ➂ | ➃ | ➄ | ➅ | ➆ | ➇ | ➈ | ➉ |

**31. Seteruk manakah hidung anda tersumbat KETIKA disahkan menghidap COVID-19?**

| Langsung tidak tersumbat |  |  |  |  |  |  |  |  |  | Tersumbat sepenuhnya |
| --- | --- | --- | --- | --- | --- | --- | --- | --- | --- | --- |
| 🄋 | ➀ | ➁ | ➂ | ➃ | ➄ | ➅ | ➆ | ➇ | ➈ | ➉ |

**32. Seteruk manakah hidung anda tersumbat SEKARANG?**

| Langsung tidak tersumbat |  |  |  |  |  |  |  |  |  | Tersumbat sepenuhnya |
| --- | --- | --- | --- | --- | --- | --- | --- | --- | --- | --- |
| 🄋 | ➀ | ➁ | ➂ | ➃ | ➄ | ➅ | ➆ | ➇ | ➈ | ➉ |

**33. Sila nilaikan tahap deria rasa anda SEBELUM menghidap penyakit COVID-19?**

| Tiada deria rasa |  |  |  |  |  |  |  |  |  | Deria rasa sangat baik |
| --- | --- | --- | --- | --- | --- | --- | --- | --- | --- | --- |
| 🄋 | ➀ | ➁ | ➂ | ➃ | ➄ | ➅ | ➆ | ➇ | ➈ | ➉ |

**34. Sila nilaikan tahap deria rasa anda KETIKA disahkan menghidap penyakit COVID-19?**

| Tiada deria rasa |  |  |  |  |  |  |  |  |  | Deria rasa sangat baik |
| --- | --- | --- | --- | --- | --- | --- | --- | --- | --- | --- |
| 🄋 | ➀ | ➁ | ➂ | ➃ | ➄ | ➅ | ➆ | ➇ | ➈ | ➉ |

**35. Adakah anda mengalami apa-apa perubahan terhadap rasa yang tertentu ketika disahkan menghidap penyakit COVID-19?**

- Manis
- Masin
- Masam
- Pahit
- Savori/Umami
- Tiada perubahan deria rasa

**36. Sila nilaikan tahap deria rasa anda SEKARANG**

| Tiada deria rasa |  |  |  |  |  |  |  |  |  | Deria rasa sangat baik |
| --- | --- | --- | --- | --- | --- | --- | --- | --- | --- | --- |
| 🄋 | ➀ | ➁ | ➂ | ➃ | ➄ | ➅ | ➆ | ➇ | ➈ | ➉ |

**TIGA soalan yang berikutnya berkaitan dengan rangsangan lain yang dirasa dalam mulut seperti perasaan membakar, sejuk atau berdenyut-denyut (tingling). Contohnya, cili, daun pudina atau minuman berkarbonat.**

**37. Sila nilaikan kebolehan anda untuk merasa rangsangan ini SEBELUM menghidap penyakit COVID-19?**

| Langsung tidak sensitif |  |  |  |  |  |  |  |  |  | Sangat sensitif |
| --- | --- | --- | --- | --- | --- | --- | --- | --- | --- | --- |
| 🄋 | ➀ | ➁ | ➂ | ➃ | ➄ | ➅ | ➆ | ➇ | ➈ | ➉ |

**38. Sila nilaikan kebolehan anda untuk merasa rangsangan ini KETIKA disahkan menghidap penyakit COVID-19?**

| Langsung tidak sensitif |  |  |  |  |  |  |  |  |  | Sangat sensitif |
| --- | --- | --- | --- | --- | --- | --- | --- | --- | --- | --- |
| 🄋 | ➀ | ➁ | ➂ | ➃ | ➄ | ➅ | ➆ | ➇ | ➈ | ➉ |

**39. Sila nilaikan kebolehan anda untuk merasa rangsangan ini SEKARANG?**

| Langsung tidak sensitif |  |  |  |  |  |  |  |  |  | Sangat sensitif |
| --- | --- | --- | --- | --- | --- | --- | --- | --- | --- | --- |
| 🄋 | ➀ | ➁ | ➂ | ➃ | ➄ | ➅ | ➆ | ➇ | ➈ | ➉ |

**40. Apakah simptom/gejala telinga yang anda alami ketika disahkan menghidap penyakit COVID-19?** (*anda boleh pilih lebih daripada satu)*

- Tiada
- Sakit telinga
- Cecair/nanah dari telinga
- Kurang dengar
- Berdengung/berdesing
- Perasaan persekitaran berpusing-pusing (*vertigo*)
- Lain-lain, sila nyatakan: __________________

**41. Adakah simptom/gejala telinga anda kini pulih?**

- Ya
- Tidak

**42. Adakah anda menerima apa-apa rawatan untuk simptom/gejala telinga anda?**

- Ya
- Tidak

**43. Apakah status jangkitan COVID-19 anda sekarang?**

- Aktif – masih dirawat di hospital
- Sembuh – discaj balik rumah

**41. Komen/makluman tambahan:**

**_________________________________________________________________________**

**_________________________________________________________________________**

**Sekiranya anda bersetuju untuk dihubungi, sila berikan maklumat anda untuk dihubungi** (tidak wajib)**:**

Nombor telefon (Mobil): ______________________________________________________

Nombor telefon (Rumah): ____________________________________________________

E-mel: _______________________________________

**Bagaimanakah anda sudi dihubungi?**

- Panggilan telefon
- WhatsApp
- E-mel

**Borang ini telah diisi oleh:**

- Sendiri (peserta soal-selidik)
- Waris (ahli keluarga/penjaga)
- Wakil pasukan perawat

**Nombor telefon bimbit waris/wakil** (pilihan, jika berkenaan):__________________

**Terima kasih atas kesudian anda menyertai soal selidik ini!**
